# Supplementary material
Source: Elsevier journal article supplement (https://www.sciencedirect.com/science/article/pii/S2444883418300664)
Supplement: mmc1 [file S2444883418300664:mmc1.docx]

**Appendix 1.** Codebook for content analysis of this study

| Code | Definition of code |
| --- | --- |
| Year | Year of publication |
| Author | List of authors |
| Article title | Title of the article |
| Journal | Publication in which the article was published |
| Research questions | Research question explicitly stated in the article |
| Level of analysis | Macro(country/region), meso (industry) or micro (individual/business) |
| Research method | Qualitative, quantitative, mixed methods |
| Research design | Case study, ethnography, historical, grounded theory, experimental… |
| Context | Country/Countries from which the data was collected |
| Data source | Survey, interview, secondary data |
| Dependent variables | Dependent variable(s) used in this study |
| Independent variables | Independent variable(s) used in this study |
| Contributions | Contributions explicitly stated in the article |
| Major findings | Major findings explicitly stated in the article |

**Appendix 2.** Categories of reviewed articles

| Articles | | | | | Categories |
| --- | --- | --- | --- | --- | --- |
| Sobel et al. (2007 | Foss et al. (2007) | Kreft and Sobel (2005) | Coyne and Leeson (2004) | Holmes and Schmitz (2001) | C1. The role of institutions (42 articles) |
| Bowen and Clercq (2008) | Sobel (2008) | Levie and Autio (2008) | Gohmann et al. (2008) | Aidis et al. (2008) |
| Campbell et al. (2013) | Hall et al. (2012) | Brixiova (2010) | Bianchi (2010) | Kshetri (2009) |
| Avnimelech et al. (2014) | Stenholm et al. (2013) | Sanders and Weitzel (2013) | Muntean (2013) | Brixiova (2013) |
| Brixiova et al. (2015) | Wyrwich (2014) | Sheriff and Muffatto (2014) | Fritsch et al. (2014) | Desai et al. (2014) |
| Mathias et al. (2015) | Wiseman (2015) | Ostapenko (2015) | Williams and Vorley (2015) | Bologna and Ross (2015) |
| Du and Mickiewicz (2016) | Coyne et al. (2016) | Wiseman (2016) | Crnogaj and Hojnik (2016) | Dong et al. (2016) |
| Box, et al (2018) | Berdiev and Saunoris (2018) | McCaffrey (2017) | Fish et al. (2017) | Williams and Vorley (2017) |
|  |  |  | Pittaki (2018) | Boudreaux, et al (2018) |
| Daskalopoulou (2016) | Hmieleski and Lerner (2016) | Collins et al. (2016) | Urbig et al. (2012) | Weitzel et al. (2010) | C2. The role of individual factors (5 articles) |
| Elert and Henrekson (2016) | Bureau (2014) | Kalantaridis (2014) | Smallbone and Welter (2012) | Henrekson and Sanandaji (2011) | C3. Entrepreneurial action and institutional change (7 articles) |
|  |  |  | Lucas and Fuller (2017) | Padilla and Cachanosky (2016) |
| Brou and Ruta (2013) | Sautet (2013) | Coyne et al. (2010) | Salgado-Banda (2007) | Mehlum et al. (2003) | C4. Entrepreneurial allocation influencing economic performance (11 articles) |
| Antony et al. (2017) | Borozan et al. (2016) | Gohmann (2016) | Twijnstra (2015) | Wiseman and Young (2013) |
|  |  |  |  | Bosma et al (2018) |
| March et al. (2016) | Andersson and Ford (2015) | Acs et al. (2013) | Smallbone et al. (2010) | Douhan & Henrekson (2010) | C5. Beyond Baumol’s typology (5 articles) |
| Champeyrache (2018) | Williams and Kedir (2016) | Boettke and Piano (2016) | Desai (2016) | Thomas and Leeson (2012) | Non-categorized (6 articles) |
|  |  |  |  | Operti (2018) |
